# Supplementary material for: CCR5 Gene Disruption via Lentiviral Vectors Expressing Cas9 and Single Guided RNA Renders Cells Resistant to HIV-1 Infection
Source: PubMed Central journal article supplement (PMC4277423; doi:10.1371/journal.pone.0115987), 2014-12-26
Supplement: pone.0115987.s001.pdf [file pone.0115987.s001.pdf]

**A**

CAS9-HA-NLS DNA sequence

ggatccaccatggacaagaagtacagcatcggcctggacatcggcaccaacagcgtgg  
gctgggcccgtgatcaccgacgagtacaaggtgccagcaagaagttcaaggtgctgggc  
aacaccgaccgccacagcatcaagaagaacctgatcggcgccctgctgttcgacagcg  
gcgagaccgcccaggccacccgcctgaagcgcaccgcccggccgctacacccgcc  
gcaagaaccgcatctgctacctgcaggagatcttcagcaacgagatggccaaggtggac  
gacagcttctccaccgctggaggagagcttctgtggaggaggacaagaagcacga  
gcgccaccccatcttcggcaacatcgtggacgaggtggcctaccacgagaagtaccca  
ccatctaccacctgcgcaagaagctgggtggacagcaccgacaaggccgacctgcgctg  
atctacctggccctggcccacatgatcaagttccgcgccacttctgatcgagggcgacct  
gaaccccgacaacagcgcgacctggacaagctgttcatccagctggtgcagacctacaacc  
agctgttcgaggagaaccccatcaacgccagcggcgtggacgccaaggccatcctgag  
cgcccgcctgagcaagagccgcccgcctggagaacctgatcgccagctgcccggcgag  
aagaagaacggcctgttcggcaacctgatcgccctgagcctgggcctgaccccaacttc  
aagagcaacttcgacctggccgaggacgccaagctgcagctgagcaaggacacctacg  
acgacgacctggacaacctgctggcccagatcggcgaccagtacgccgacctgttctgg  
ccgccaagaacctgagcgcgacctcctgctgagcgacatcctgcgctgaacaccgag  
atcaccaaggccccctgagcgcagcatgatcaagcgcctacgacgagcaccaccagg  
acctgacctgctgaaggccctggtgcccagcagctgcccgagaagtacaaggagatc  
ttctcgaccagagcaagaacggctacgccggctacatcgacggcggcgccagccagg  
aggagtctacaagttcatcaagcccatcctggagaagatggacggcaccgaggagctg  
ctggtgaagctgaaccgagaggacctgctgcaagcagcgcaccttcgacaacggca  
gcatccccaccagatccacctggcgagctgcacgccatcctgcccggccaggagga  
cttctacccttctgaaggacaaccgagagaagatcgagaagatcctgaccttccgcatc  
ccctactacgtgggccccctggcccgcgcaacagccgcttcgctggtgacctgcaa  
gagcgaggagaccatcacccctggaacttcgaggaggtggtggacaagggcgccag  
cgcccagagcttcatcgagcgcgatgaccaacttcgacaagaacctgcccacgagaag  
gtgctgccaagcacagcctgctgtacgagtacttcaccgtgtacaacgagctgaccaag  
gtgaagtacgtgaccgagggcatgcaagcccgccttctgagcggcgagcagaaga  
aggccatcgtggacctgctgttcaagaccaaccgcaaggtgacctgaaagcagctgaa  
gaggactactcaagaagatcgagtgcttcgacagcgtggagatcagcggcgtggagga  
ccgcttcaacgccagcctgggacacctaccgacctgctgaagatcatcaaggacaagg  
acttctggacaacgaggagaacgaggacatcctggaggacatcgtgctgacctgacc  
ctgttcgaggaccgagatgatcgaggagcgcctgaagacctacgccacctgttcgac  
gacaaggtgatgaagcagctgaagcggccgctacaccggctggggccgctgagcc  
gcaagctgatcaacggcatccgcaagcagagcggcaagacctcctggacttctg  
aagagcgacggcttcgccaaccgcaacttcagcagctgatccacgacgacagcctgac  
cttcaaggaggacatccagaaggcccaggtgagcggccagggcgacagcctgcacga  
gcacatcgccaacctggccggcagccccgcatcaagaaggccatcctgcagacctg  
aaggtggtggacgagctggtgaaggtgatgggcccgcacaagcccgagaacatcgtgat  
cgagatggcccgcgagaaccagaccaccagaaggccagaagaacagccgag  
cgcatgaagcgcacgagggagggcatcaaggagctgggcagccagatcctgaaggag

caccccgtggagaacaccagctgcagaacgagaagctgtacctgtactacctgcagaa  
cggccgcatgtacgtggaccaggagctggacatcaaccgctgagcgactacgac  
gtggaccacatcgtgccccagagcttctgaaggacgacagcatcgacaacaaggtgct  
gacccgagcgacaagaaccgcggaagagcgacaacgtgccagcgaggaggtgg  
tgaagaagatgaagaactactggcgccagctgctgaacgccaagctgatcaccagcgc  
aagttcgacaacctgaccaaggccgagcgcggcgccctgagcgagctggacaaggcc  
ggcttcatcaagcgccagctggtggagacccgccagatcaccaagcacgtggccagat  
cctggacagccgcatgaacaccaagtacgacgagaacgacaagctgatccgagagtg  
aaggtgatcaccctgaagagcaagctggtgagcgacttccgcaaggactccagttctac  
aaggtgcgcgagatcaacaactaccaccacgcccacgacgcctacctgaacgccgtggt  
ggcaccgccctgatcaagaagtacccaagctggagagcgagttcgtgtacggcgact  
acaaggtgtacgacgtgcaagatgatcgccaagagcgagcaggagatcggcaagg  
ccaccgccaagtacttcttacagcaacatcatgaacttctcaagaccgagatcacctg  
gccaacggcgagatccgcaagcgccccctgatcgagaccaacggcgagaccggcga  
gatcgtgtgggacaagggccgacttccgaccctgcaaggtgctgagcatgccc  
aggtgaacatcgtgaagaagaccgaggtgcagaccggcggttcagcaaggagagcat  
cctgccaagcgcaacagcgacaagctgatcgcccgaagaaggactgggaccccaa  
gaagtacggcggttcgacagccccaccgtggcctacagcgtgctggtggtggccaaggt  
ggagaagggaagagcaagaagctgaagagcgtgaaggagctgctgggcatcacat  
catggagcgcagcagcttcgagaagaaccccatcgacttctggaggccaagggctaca  
aggaggtgaagaaggacctgatcatcaagctgccaagtacagcctgttcgagctggag  
aacggccgcaagcgcgatgctggccagcgcggcgagctgcagaagggaacgagctg  
gccctgccagcaagtacgtgaacttctgtacctggccagccactacgagaagctgaag  
ggcagccccgaggacaacgagcagaagcagctgttcgtggagcagcacaagcactac  
ctggacgagatcatcgagcagatcagcgagttcagcaagcgcgtgatcctggccgacgc  
caacctggacaaggtgctgagcgcctacaacaagcaccgagcaagcccatccgca  
gcaggccgagaacatcatccacctgttcacctgaccaacctgggcccccgccgctt  
caagtacttcgacaccaccatcgaccgcaagcgcctacaccagcacaaggaggtgctg  
gacgccaccctgatccaccagagcatcaccggcctgtacgagacccgcatcgacctgag  
ccagctgggcggcgactaccctacgacgtgccgactacgcccaccccccaagaag  
cgcaaggtgtaagtcgac

HA

NLS

**B**

**U6 promoter + target RNA + guide RNA scaffold:**

TGTACAAAAAAGCAGGCTTTAAAGGAACCAATTCAGTCGACTG  
GATCCGGTACCAAGGTCGGGCAGGAAGAGGGCCTATTTCCC  
ATGATTCCTTCATATTTGCATATACGATACAAGGCTGTTAGAG  
AGATAATTAGAATTAATTTGACTGTAAACACAAAGATATTAGTA  
CAAATACGTGACGTAGAAAGTAATAATTTCTTGGGTAGTTTG  
CAGTTTTAAAATTATGTTTTAAAATGGACTATCATATGCTTACC  
GTAACCTGAAAGTATTTGATTTCTTGGCTTTATATATCTTGTG

GAAAGGACGAAACACC**GNNNNNNNNNNNNNNNNNNNNNGTTTT**  
**AGAGCTAGAAATAGCAAGTTAAAATAAGGCTAGTCCGTTAT**  
**CAACTTGAAAAAGTGGCACCGAGTCGGTGCTTTTTT**

| <b>sgRNA</b> | <b>Strand polarity</b> | <b>Target sequence</b> |
|--------------|------------------------|------------------------|
| CR1          | +                      | GCTTGTGACACGGACTCAAG   |
| CR2          | +                      | GGTCCTGCCGCTGCTTGTCA   |
| CR3          | -                      | GTAAACTGAGCTTGCTCGCT   |
| GF1          | +                      | GGAGCGCACCATCTTCTTCA   |
