# Supplementary material for: CCR5 Gene Disruption via Lentiviral Vectors Expressing Cas9 and Single Guided RNA Renders Cells Resistant to HIV-1 Infection
Source: PubMed Central journal article supplement (PMC4277423; doi:10.1371/journal.pone.0115987), 2014-12-26
Supplement: pone.0115987.s002.pdf [file pone.0115987.s002.pdf]

CR1 Wild-type  
GCTCCGGAGCGAAGCTCAGTTTACACCCGATCCACTGGGAGCGAGAAATATCTGTGGCTTGTGACACGGACTCAAAGTGGCTGGTGAACCCAGTCAAGTGTGCGACATGGCTTAGTTTT WT  
CR1 genome and transgene targeting deletions (19)  
GCTCCGGAGCGAAGCTCAGTTTACACCCGATCCACTGGGAGCGAGAAATATCTGTGGCTTGTGACACGGA- -CAAGTGGCTGGTGAACCCAGTCAAGTGTGCGACATGGCTTAGTTTT -2  
GCTCCGGAGCGAAGCTCAGTTTACACCCGATCCACTGGGAGCGAGAAATATCTGTGGCTTGTGACACGGA- -AGTGGCTGGTGAACCCAGTCAAGTGTGCGACATGGCTTAGTTTT -4  
GCTCCGGAGCGAAGCTCAGTTTACACCCGATCCACTGGGAGCGAGAAATATCTGTGGCTTGTGTA- -AGTGGCTGGTGAACCCAGTCAAGTGTGCGACATGGCTTAGTTTT -8  
GCTCCGGAGCGAAGCTCAGTTTACACCCGATCCACTGGGAGCGAGAAATATCTGTGGCTTGTGACACGGA- -CTGGTGAACCCAGTCAAGTGTGCGACATGGCTTAGTTTT -10  
GCTCCGGAGCGAAGCTCAGTTTACACCCGATCCACTGGGAGCGAGAAATATCTGTGGCTTGTG- -ACTGGTGAACCCAGTCAAGTGTGCGACATGGCTTAGTTTT -16  
GCTCCGGAGCGAAGCTCAGTTTACACCCGATCCACTGGGAGCGAGAAATATCTGTGGCTTGTGACACGGACT- -CAAGTCAAGTGTGCGACATGGCTTAGTTTT -17 x2  
GCTCCGGAGCGAAGCTCAGTTTACACCCGATCCACTGGGAGCGAGAAATATCTGTGGCTTGTG- -ACCCAGTCAAGTGTGCGACATGGCTTAGTTTT -23 x2  
GCTCCGGAGCGAAGCTCAGTTTACACCCGATCCACTGGGAGCGAGAAATATCTGTGGCTTGTG- -ACCCAGTCAAGTGTGCGACATGGCTTAGTTTT -23 x4  
GCTCCGGAGCGAAGCTCAGTTTACACCCGATCCACTGGGAG- -TTCTAGTTTT -68  
GCTCCCTAGCAG- -TTT -108 x5  
CR1 genome targeting deletions (15)  
GCTCCGGAGCGAAGCTCAGTTTACACCCGATCCACTGGGAGCGAGAAATATCTGTGGCTTGTGACACGGACTG- -GTGGCTGGTGAACCCAGTCAAGTGTGCGACATGGCTTAGTTTT -2  
GCTCCGGAGCGAAGCTCAGTTTACACCCGATCCACTGGGAGCGAGAAATATCTGTGGCTTGTGACACGGACTG- -GGCTGGTGAACCCAGTCAAGTGTGCGACATGGCTTAGTTTT -4  
GCTCCGGAGCGAAGCTCAGTTTACACCCGATCCACTGGGAGCGAGAAATATCTGTGGCTTGTGACACGGACT- -GGTGAACCCAGTCAAGTGTGCGACATGGCTTAGTTTT -10  
GCTCCGGAGCGAAGCTCAGTTTACACCCGATCCACTGGGAGCGAGAAATATCTGTGGCTTGTGAC- -CCAGTCAAGTGTGCGACATGGCTTAGTTTT -23  
GCTCCGGAGCGAAGCTCAGTTTACACCCGATCCACTGGGAGCGAGAAATATCTGTGGCTTGTGAC- -CCAGTCAAGTGTGCGACATGGCTTAGTTTT -23 x6  
GCTCCGGAGCGAAGCTCAGTTTACACCCGATCCACTGGGAGCGAGAAATATCTGTGGCTTGTGAC- -CCAGTCAAGTGTGCGACATGGCTTAGTTTT -23 x2  
GCTCCGGAGCGAAGCTCAGTTTACACCCGATCCACTGGGAGCGAGAAATATCTGTGGCTTGTG- -CATGCGCTTAGTTTT -40  
GCTCCGGAGCGAAGCTCAGTTTACACCCGATCCACTGGGAGCGAGAAATATCTGTGGCTTGTG- -GGTGAACCCAGTCAAGTGTGCGACATGGCTTAGTTTT -84  
TTGGTTTTGGGCAACATGCTGGTCACTCTCTGATAACTGCAAAAGGCTGAAGAGCTGACTGACTCTACCTGCTCAACTGGCCATCTGACCTGTTTTTCCA- -  
-839  
GGCTGGTGAACCCAGTCAAGTGTGCGACATGGCTTAGTTTT

CR2 Wild-type  
GGGGCTGGTCTGCCGCTGCTTG-TCATGGTCATCTGCTACTCGGGAATCCTAAAAACTCTGCTTCGGTGTGCAAAATGAGAAGAAAGGGCACAGGGCTGTGAGGCTTATCTCCACCATCATG WT  
CR2N genome and transgene targeting deletions (8)  
GGGGCTGGTCTGCCGCTGCT- -TGGTCATCTGCTACTCGGGAATCCTAAAAACTCTGCTTCGGTGTGCAAAATGAGAAGAAAGGGCACAGGGCTGTGAGGCTTATCTCCACCATCATG -5  
GGGGCTGGTCTGCCGCT- -GCTACTCGGGAATCCTAAAAACTCTGCTTCGGTGTGCAAAATGAGAAGAAAGGGCACAGGGCTGTGAGGCTTATCTCCACCATCATG -17 x4  
GGGGCTGGTCTGCCGCT- -ACTCGGGAATCCTAAAAACTCTGCTTCGGTGTGCAAAATGAGAAGAAAGGGCACAGGGCTGTGAGGCTTATCTCCACCATCATG -20  
GGG- -CATGGTCATCTGCTACTCGGGAATCCTAAAAACTCTGCTTCGGTGTGCAAAATGAGAAGAAAGGGCACAGGGCTGTGAGGCTTATCTCCACCATCATG -21  
GGGGCTGGTCTGCCGCT- -GGGAATCCTAAAAACTCTGCTTCGGTGTGCAAAATGAGAAGAAAGGGCACAGGGCTGTGAGGCTTATCTCCACCATCATG -24  
CR2 genome and transgene targeting insertion (1)  
GGGGCTGGTCTGCCGCTGCTTG-TCATGGTCATCTGCTACTCGGGAATCCTAAAAACTCTGCTTCGGTGTGCAAAATGAGAAGAAAGGGCACAGGGCTGTGAGGCTTATCTCCACCATCATG 1  
CR2 genome targeting deletions (16)  
GGGGCTGGTCTGCCGCTG- -CATGGTCATCTGCTACTCGGGAATCCTAAAAACTCTGCTTCGGTGTGCAAAATGAGAAGAAAGGGCACAGGGCTGTGAGGCTTATCTCCACCATCATG -5  
GGGGCTGGTCTGCCGCTGCT- -TGGTCATCTGCTACTCGGGAATCCTAAAAACTCTGCTTCGGTGTGCAAAATGAGAAGAAAGGGCACAGGGCTGTGAGGCTTATCTCCACCATCATG -5  
GGGGCTGGTCTGCCGCT- -ATGGTCATCTGCTACTCGGGAATCCTAAAAACTCTGCTTCGGTGTGCAAAATGAGAAGAAAGGGCACAGGGCTGTGAGGCTTATCTCCACCATCATG -8  
GGGGCTGGTCTGCCGCTG- -TCATCTGCTACTCGGGAATCCTAAAAACTCTGCTTCGGTGTGCAAAATGAGAAGAAAGGGCACAGGGCTGTGAGGCTTATCTCCACCATCATG -10  
GGGGCTGGTCTGCCGCTG- -CATCTGCTACTCGGGAATCCTAAAAACTCTGCTTCGGTGTGCAAAATGAGAAGAAAGGGCACAGGGCTGTGAGGCTTATCTCCACCATCATG -11 x2  
GGGGCTGGTCTGCCGCTG- -TCATCTGCTACTCGGGAATCCTAAAAACTCTGCTTCGGTGTGCAAAATGAGAAGAAAGGGCACAGGGCTGTGAGGCTTATCTCCACCATCATG -16  
GGGGCTGGTCTGCCGCTG- -CTACTCGGGAATCCTAAAAACTCTGCTTCGGTGTGCAAAATGAGAAGAAAGGGCACAGGGCTGTGAGGCTTATCTCCACCATCATG -17 x2  
GGGGCTGGTCTGCCGCTG- -CTTGGGAATCCTAAAAACTCTGCTTCGGTGTGCAAAATGAGAAGAAAGGGCACAGGGCTGTGAGGCTTATCTCCACCATCATG -20  
GGGGTGGTCTGCCGCT- -ATCTGCTACTCGGGAATCCTAAAAACTCTGCTTCGGTGTGCAAAATGAGAAGAAAGGGCACAGGGCTGTGAGGCTTATCTCCACCATCATG -21  
GGGGCTGGTCTGCCGCTG- -TACTCGGGAATCCTAAAAACTCTGCTTCGGTGTGCAAAATGAGAAGAAAGGGCACAGGGCTGTGAGGCTTATCTCCACCATCATG -23  
GGGGCTGGTCTGCCGCTGCTTG- -AAAACTCTGCTTCGGTGTGCAAAATGAGAAGAAAGGGCACAGGGCTGTGAGGCTTATCTCCACCATCATG -30  
GGGGCTGGTCTGCCGCTG- -CTTCGGTGTGCAAAATGAGAAGAAAGGGCACAGGGCTGTGAGGCTTATCTCCACCATCATG -42  
GGGGCTGGTCTGCCGCTGCTTG- -CATCTGCTACTCGGGAATCCTAAAAACTCTGCTTCGGTGTGCAAAATGAGAAGAAAGGGCACAGGGCTGTGAGGCTTATCTCCACCATCATG -88  
-426  
-CTACTCGGGAATCCTAAAAACTCTGCTTCGGTGTGCAAAATGAGAAGAAAGGGCACAGGGCTGTGAGGCTTATCTCCACCATCATG

CR2 genome targeting insertion (1)  
GGGGCTGGTCTGCCGCTGCTTG-TCATGGTCATCTGCTACTCGGGAATCCTAAAAACTCTGCTTCGGTGTGCAAAATGAGAAGAAAGGGCACAGGGCTGTGAGGCTTATCTCCACCATCATG 1  
CR2 genome targeting deletion and insertion (2)  
GGGGCTGGTCTGCCGCTGCTTG-A-CATGG-TCATCTGCTACTCGGGAATCCTAAAAACTCTGCTTCGGTGTGCAAAATGAGAAGAAAGGGCACAGGGCTGTGAGGCTTATCTCCACCATCATG (+1)/(-1)  
GGGGCTGGTCTGCCGCTGCT- -CATCTGCTACTCGGGAATCCTAAAAACTCTGCTTCGGTGTGCAAAATGAGAAGAAAGGGCACAGGGCTGTGAGGCTTATCTCCACCATCATG (+2)/(-2)

CR3 Wild-type  
GTCACAAGCCACAGATATTTCTGCTCCCCAGTGGATCGGGTGTAAACT- -GAGCTTGTCT- -GCTCGGGAGCCTCTTCTGCTGAAAAATAGAACAGCATTTGCGAAGCGCTTTGGCAATGTGC WT  
CR3 genome and transgene targeting deletions (13)  
GTCACAAGCCACAGATATTTCTGCTCCCCAGTGGATCGGGTGTAAACT- -GAGCTTGTCT- -TCGGTAGCCTCTTCTGCTGAAAAATAGAACAGCATTTGCGAAGCGCTTTGGCAATGTGC -2  
GTCACAAGCCACAGATATTTCTGCTCCCCAGTGGATCGGGTGTAAACT- -GAGCTTGTCT- -GGAGCCTCTTCTGCTGAAAAATAGAACAGCATTTGCGAAGCGCTTTGGCAATGTGC -4 x2  
GTCACAAGCCACAGATATTTCTGCTCCCCAGTGGATCGGGTGTAAACT- -GAGGTTG- -GGAGCCTCTTCTGCTGAAAAATAGAACAGCATTTGCGAAGCGCTTTGGCAATGTGC -7  
GTCACAAGCCACAGATATTTCTGCTCCCCAGTGGATCGGGTGTAAACT- -GAGCT- -CGGGAGCCTCTTCTGCTGAAAAATAGAACAGCATTTGCGAAGCGCTTTGGCAATGTGC -8 x4  
GTCACAAGCCACAGATATTTCTGCTCCCCAGTGGATCGGGTGTAAACT- -GAGCTTGGT- -AGCCTCTTCTGCTGAAAAATAGAACAGCATTTGCGAAGCGCTTTGGCAATGTGC -8  
GTCACAAGCCACAGATATTTCTGCTCCCCAGTGGATCGGGTGTAAACT- -GAGCTTGTCT- -GCCTCTTCTGCTGAAAAATAGAACAGCATTTGCGAAGCGCTTTGGCAATGTGC -8  
GTCACAAGCCACAGATATTTCTGCTCCCCAGTGGATCGGGTGTAAACT- -GAGCTTGT- -CTGAAAAATAGAACAGCATTTGCGAAGCGCTTTGGCAATGTGC -19  
GTCACAAGCCACAGATATTTCTGCTCCCCAGTGGATCGGGTGTAAACT- -GGAGCCTCTTCTGCTGAAAAATAGAACAGCATTTGCGAAGCGCTTTGGCAATGTGC -25  
GTCACAAGCCACAGATATTTCTGCTCCCCAGTGGATCGGGTGTAAACT- -TGGAGCCTCTTCTGCTGAAAAATAGAACAGCATTTGCGAAGCGCTTTGGCAATGTGC -23  
CR3 genome and transgene targeting insertion (6)  
GTCACAAGCCACAGATATTTCTGCTCCCCAGTGGATCGGGTGTAAACT- -GAGCTTGTCT- -GCTCGGGAGCCTCTTCTGCTGAAAAATAGAACAGCATTTGCGAAGCGCTTTGGCAATGTGC 1  
GTCACAAGCCACAGATATTTCTGCTCCCCAGTGGATCGGGTGTAAACT- -GAGCTTGTCT- -GCTCGGGAGCCTCTTCTGCTGAAAAATAGAACAGCATTTGCGAAGCGCTTTGGCAATGTGC 1 x4  
GTCACAAGCCACAGATATTTCTGCTCCCCAGTGGATCGGGTGTAAACT- -GAGCTTGTCT- -GCTCGGGAGCCTCTTCTGCTGAAAAATAGAACAGCATTTGCGAAGCGCTTTGGCAATGTGC 1  
CR3 genome targeting deletions (11)  
GTCACAAGCCACAGATATTTCTGCTCCCCAGTGGATCGGGTGTAAACT- -GAGCTTGTCT- -GGGAGCCTCTTCTGCTGAAAAATAGAACAGCATTTGCGAAGCGCTTTGGCAATGTGC -4 x3  
GTCACAAGCCACAGATATTTCTGCTCCCCAGTGGATCGGGTGTAAACT- -GAGCAAGCTCA- -GTAGCCTCTTCTGCTGAAAAATAGAACAGCATTTGCGAAGCGCTTTGGCAATGTGC -4  
GTCACAAGCCACAGATATTTCTGCTCCCCAGTGGATCGGGTGTAAACT- -GAGCT- -CGGGAGCCTCTTCTGCTGAAAAATAGAACAGCATTTGCGAAGCGCTTTGGCAATGTGC -8  
GTCACAAGCCACAGATATTTCTGCTCCCCAGTGGATCGGGTGTAAACT- -GAGCT- -GAGCCTCTTCTGCTGAAAAATAGAACAGCATTTGCGAAGCGCTTTGGCAATGTGC -10  
GTCACAAGCCACAGATATTTCTGCTCCCCAGTGGATCGGGTGTAAACT- -GAGCTTGT- -CTGAAAAATAGAACAGCATTTGCGAAGCGCTTTGGCAATGTGC -19  
GTCACAAGCCACAGATATTTCTGCTCCCCAGTGGATCGGGTGTAAACT- -GAG- -CTCTTCTGCTGAAAAATAGAACAGCATTTGCGAAGCGCTTTGGCAATGTGC -17  
GTCACAAGCCACAGATATTTCTGCTCCCCAGTGGATCGGGTGTAAACT- -TAGCCTCTTCTGCTGAAAAATAGAACAGCATTTGCGAAGCGCTTTGGCAATGTGC -27 x2  
GTCACAAGCCACAGATATTTCTGCTCCCCAGTGGATCGGGTGTAAACT- -GAGCT- -  
-199  
- - - - -ACTGCAATATTCAGGCCAAAGAAATTCCTGGAAAGTGTTCAGGAGAAAGCAATGTTGTAGGGAGCCCAAGAGAAATAAACCAATCATGATGGTGAAGATAAGCCCTCACAG  
CR3 genome targeting insertion (8)  
GTCACAAGCCACAGATATTTCTGCTCCCCAGTGGATCGGGTGTAAACT- -GAGCTTGTCT- -GCTCGGGAGCCTCTTCTGCTGAAAAATAGAACAGCATTTGCGAAGCGCTTTGGCAATGTGC 1 x4  
GTCACAAGCCACAGATATTTCTGCTCCCCAGTGGATCGGGTGTAAACT- -GAGCTTGTCT- -GCTCGGGAGCCTCTTCTGCTGAAAAATAGAACAGCATTTGCGAAGCGCTTTGGCAATGTGC 1  
GTCACAAGCCACAGATATTTCTGCTCCCCAGTGGATCGGGTGTAAACT- -GAGCTTGTCT- -GCTCGGGAGCCTCTTCTGCTGAAAAATAGAACAGCATTTGCGAAGCGCTTTGGCAATGTGC 1  
GTCACAAGCCACAGATATTTCTGCTCCCCAGTGGATCGGGTGTAAACT- -GAGCTTGTCT- -GCTCGGGAGCCTCTTCTGCTGAAAAATAGAACAGCATTTGCGAAGCGCTTTGGCAATGTGC 2 x2  
CR3 genome targeting deletion and insertion (1)  
GTCACAAGCCACAGATATTTCTGCTCCCCAGTGGATCGGGTGTAAACT- -AAGAG- - - - -GCTCGGGAGCCTCTTCTGCTGAAAAATAGAACAGCATTTGCGAAGCGCTTTGGCAATGTGC (-1)/2(-7)
