# Supplementary material for: CCR5 Gene Disruption via Lentiviral Vectors Expressing Cas9 and Single Guided RNA Renders Cells Resistant to HIV-1 Infection
Source: PubMed Central journal article supplement (PMC4277423; doi:10.1371/journal.pone.0115987), 2014-12-26
Supplement: pone.0115987.s003.pdf [file pone.0115987.s003.pdf]

|                      | sgRNA       | Target Sequence         | Primer Code                  | Primer Sequence (5'-3')                        |
|----------------------|-------------|-------------------------|------------------------------|------------------------------------------------|
| T7E1                 | CR1         | GCTTGTGACACGGACTCAAGTGG | CR1F990                      | TGCTGCATCAACCCCATCAT                           |
|                      |             |                         | CR1R1750                     | CACAAGTCTCTCGCCTGGTT                           |
|                      | CR2         | GGTCCTGCCGCTGCTTGTCATGG | CR2/3F593                    | GTTTGCGTCTCTCCCAGGAA                           |
|                      | CR3         | GTAAACTGAGCTTGCTCGCTCGG | CR2/3R1254                   | CAGCCCAGGCTGTGTATGAA                           |
|                      | Intron-span |                         | CR1/2/3F2559<br>CR1/2/3R3893 | GACAGGGAAGCTAGCAGCAA<br>CAGCCCAGGCTGTGTATGAA   |
| Sanger<br>Sequencing | CR1         | GCTTGTGACACGGACTCAAGTGG | CR1F1099                     | TTTTCCAGCAAGAGGCTCCC                           |
|                      |             |                         | CR1R1254                     | CAGCCCAGGCTGTGTATGAA                           |
|                      | CR2         | GGTCCTGCCGCTGCTTGTCATGG | CR2F651<br>CR2R820           | ACCTGCAGCTCTCATTTCCTCA<br>GCCCTGTGCCTCTTCTTCTC |
|                      | CR3         | GTAAACTGAGCTTGCTCGCTCGG | CR3F1061<br>CR3R1203         | AAAGCACATTGCCAAACGCT<br>TGCACAACTCTGACTGGGTC   |
|                      | Intron-span |                         | CR1/2/3F2559<br>CR1/2/3R3893 | GACAGGGAAGCTAGCAGCAA<br>CAGCCCAGGCTGTGTATGAA   |
