# Supplementary material for: CCR5 Gene Disruption via Lentiviral Vectors Expressing Cas9 and Single Guided RNA Renders Cells Resistant to HIV-1 Infection
Source: PubMed Central journal article supplement (PMC4277423; doi:10.1371/journal.pone.0115987), 2014-12-26
Supplement: pone.0115987.s004.pdf [file pone.0115987.s004.pdf]

|     | Gene Name | Refseq NO.   | Off Target Sequence | Primer Pairs (5'-3')                            |
|-----|-----------|--------------|---------------------|-------------------------------------------------|
| CR2 | AKAP9     | NM_147185    | CCATGACAAGCAGGGG    | ACAAGAGGAGTATGCTTGCCT<br>TTTCACTTGGTTGAGTTGCTCT |
|     | ULK1      | NM_003565    | CCTGGACAAGCAGCGG    | TGTCGTCCACTGTGAAGCAG<br>GGCACCCGTACAATCAAGGA    |
|     | MED16     | NM_005481    | CCGCTGCTTGTCCAGG    | GAGACCTGCCTGGAAGCAAA<br>CCCCACTGCTCACTTTGGAT    |
| CR3 | CLPP      | NM_006012    | CCTAGCGAGCGAGCTC    | TCGGTAAGGGGACTCGAACT<br>GATGGGAATGAGCGGGAGAG    |
|     | ASB9P1    | NR_033769    | GAGCTTGCTCGCTTAG    | GCCTCCAGCCAGTTAGACC<br>GGTTCAGGTCTGCTCCTGAC     |
|     | LINC00265 | NR_026999    | GAGCTTGCTTGCTGGG    | GATGCCCAACTCATGCCTCT<br>ATTTCCAGGCCGACTTGAGG    |
|     | SH2D5     | NM_001103161 | GAGCTTGCTGGCTGGG    | CCACTCACATGAGGTCCCAC<br>GGCCACTGACTTGCTTTGTG    |
|     | NR2F1     | NM_005654    | GAGCTTGCTCGCCGGG    | CCGGCGTGAATTATCCCGTA<br>TGTTGTGGTTCCTGCTGTTT    |
|     | PRRT1     | NM_030651-2  | GAGCTTGCTCGCAAGG    | ATCCCTAAAAACGCCCTGG<br>CCAGGGAGAAGGGTCCTACA     |
|     | ASB9P1    | NM_024087    | CTAAGCGAGCAAGCTC    | GCCTCCAGCCAGTTAGACC<br>GGTTCAGGTCTGCTCCTGAC     |
|     | ENDOV     | NM_001164638 | CCTAGGGAGCAAGCTC    | ACTCCAAAGCAAAGCCCAGT<br>TTCTACGCTTGCACTGCTCC    |
|     | SOBP      | NM_018013    | CCTGGCGAGCAAGCTC    | TGGCACTGAGTTGGTGAGAC<br>CACCAGTCAGGGAGAGGAGA    |



---

---

---
